# Supplementary material
Source: HighWire-hosted journal article supplement (http://cmajopen.ca/highwire/filestream/87496/field_highwire_adjunct_files/2/open-2021-0061-original_submission.pdf)
Supplement: open-2021-0061-original_submission.pdf [file open-2021-0061-original_submission.pdf]

1  
2  
3 **Health care access among transgender and non-binary people in Canada, 2019: A cross-**  
4 **sectional survey**  
5

6 Ayden I. Scheim,<sup>1,2</sup> Todd Coleman,<sup>3</sup> Nathan Lachowsky,<sup>4</sup> Greta R. Bauer<sup>5</sup>  
7  
8

- 9 1. Department of Epidemiology and Biostatistics, Dornsife School of Public Health, Drexel  
10 University, Philadelphia, PA, USA  
11 2. Li Ka Shing Knowledge Institute, St. Michael's Hospital, Toronto, ON, Canada  
12 3. Department of Health Sciences, Wilfrid Laurier University, Waterloo, ON, Canada  
13 4. School of Public Health & Social Policy, Faculty of Human & Social Development,  
14 University of Victoria, Victoria, BC, Canada  
15 5. Department of Epidemiology and Biostatistics, Schulich School of Medicine & Dentistry,  
16 Western University, London, ON, Canada  
17  
18  
19

20 **Corresponding author:**  
21

22 Ayden I. Scheim  
23 Department of Epidemiology and Biostatistics, Dornsife School of Public Health, Drexel  
24 University, 3215 Market Street, Philadelphia, PA, USA, 19104  
25  
26

27 Email: draschein@gmail.com  
28 Phone: (267) 359-6359  
29  
30

31 **Funding:** Canadian Institutes of Health Research (PJT-159690)  
32

33 **Competing interests:** None  
34  
35  
36  
37  
38  
39  
40  
41  
42  
43  
44  
45  
46  
47  
48  
49  
50  
51  
52  
53  
54  
55  
56  
57  
58  
59  
60

## ABSTRACT

**Background:** Drawing on the first national survey of trans and non-binary adolescents and adults in Canada, this study characterizes access to primary and gender-affirming care, and unmet health care need, by province or region.

**Methods:** Trans PULSE Canada was a bilingual, multi-mode, convenience sampling survey of trans and non-binary people aged 14 and above conducted from August to October 2019.

Average marginal predictions for each province or region were estimated from multivariable logistic regression models to standardize for sociodemographics.

**Results:** 2217 trans and non-binary participants were included in these analyses. Most had a primary care provider (81.4%, 95% CI: 79.8 – 83.0), with model-predicted probabilities from 52.1% (95% CI: 20.2 – 84.1) in the Territories to 92.9% (95% CI: 83.5 – 100.0) in Newfoundland and Labrador. Only 52.3% (95% CI: 50.3 – 54.2) had a PCP with whom they were comfortable discussing trans health issues and 44.4% (95% CI: 42.3 – 46.4) reported past-year unmet health care need. Among participants who needed gender-affirming medical treatment, self-defined treatment completion ranged from an estimated 16.6% in Newfoundland and Labrador (95% CI: 0.6 – 32.5%) to 59.1% (95% CI: 52.5 – 65.6) in Quebec. Of those who needed but had not completed gender-affirming care at the time of the study, 40.7% (95% CI: 37.8 – 43.6) were on a waitlist, most often for surgery.

**Interpretation:** Despite efforts toward equity in access to care for trans and non-binary people in Canada, participants generally reported poorer healthcare access than other Canadians, and considerable unmet need for gender-affirming care, with substantial regional variation.

## BACKGROUND

Transgender (trans) and gender non-binary persons<sup>1</sup> constitute an estimated 0.1% to 2% of the population, varying based on geographic location.<sup>2</sup> Health inequities experienced by trans and non-binary populations have been increasingly documented over the past decade. These include higher rates of mental health concerns, driven in part by stigma and discrimination.<sup>3</sup> In addition, many trans and non-binary people require access to gender-affirming medical treatments (e.g., hormones and/or surgery)<sup>4</sup> and completion of such treatment has been associated with reduced suicide risk among trans people in Ontario.<sup>5</sup> These health inequities and trans-specific care needs necessitate facilitated health care access for trans and non-binary communities. Primary care is generally the first engagement point with health care in Canada, including for gender-affirming treatment,<sup>6</sup> and many social determinants of health frameworks place quality health care services as a human right.<sup>7</sup>

Previous Canadian studies have highlighted health care access issues for trans and non-binary persons. Trans PULSE Ontario, using respondent-driven sampling to calculate estimates for the Ontario trans population, explored primary care in several analyses. The 2009-2010 study found that 17.2% of trans Ontarians did not have a family physician,<sup>8</sup> as compared with 9.1% of Ontarians overall in 2011.<sup>9</sup> Trans Ontarians were approximately three times more likely to report an unmet health care need when compared with the age-standardized Ontario population (33.2% versus 10.7%).<sup>10</sup> Further, realizable access to gender-affirming care requires that trans and non-binary people feel able to discuss their health needs with providers. However, among those with a regular family physician, approximately 37% reported discomfort discussing trans-specific health issues with that physician.<sup>11</sup> Relationships with primary care providers are integral to long-term positive health outcomes for trans persons. A survey of trans adolescents and young

1  
2  
3 adults in Canada found that having a doctor who was aware of one's gender identity, and  
4  
5 comfort with a family doctor, were positively associated with general and mental health.<sup>12</sup>  
6

7  
8 Existing quantitative data on trans health care access in Canada largely come from the  
9  
10 2009-2010 Trans PULSE Ontario study. Much has changed in the intervening decade, including  
11  
12 the introduction of province-wide continuing medical education and care navigation  
13  
14 initiatives<sup>13,14</sup> and increased coverage for gender-affirming surgical care under provincial and  
15  
16 territorial health insurance plans. In addition, as health care is primarily a provincial/territorial  
17  
18 responsibility in Canada, it is critical to understand geographic variation in access to care for  
19  
20 trans and non-binary people. However, there is a paucity of national data on trans and non-binary  
21  
22 adolescents and adults. Drawing on data from the first all-ages, comprehensive national survey  
23  
24 of trans and non-binary health in Canada, this paper compares access to primary and gender-  
25  
26 affirming care amongst trans and non-binary participants living in different provinces or regions.  
27  
28  
29

## 30 **METHODS**

### 31 *Study Design*

32  
33  
34  
35 Trans PULSE Canada was a national, community-based research study on the health of  
36  
37 transgender and gender non-binary (collectively "trans") people in Canada. Survey data  
38  
39 collection occurred over a 10-week period from August through October 2019, using a multi-  
40  
41 mode convenience sampling approach. Eligible participants were 14 years of age or older, living  
42  
43 in Canada, and indicated that their gender identity differed from their sex assigned at birth. The  
44  
45 survey could be completed in English or French online, via paper copy (mailed out with a self-  
46  
47 addressed, stamped return envelope), by telephone (with or without a language interpreter), or on  
48  
49 an electronic tablet with a Peer Research Associate in 11 major urban areas. The survey was  
50  
51 promoted online (mailing lists, social media), in-person at sexual and gender minority-focused  
52  
53  
54  
55  
56  
57  
58  
59  
60

1  
2  
3 community spaces and events (e.g., Pride festivals), and through outreach by Peer Research  
4 Associates. Participants were given the choice of completing the full-length survey (~60  
5 minutes) or a short-form (~10 minutes) containing key items from each section. The survey was  
6 initially adapted from Trans PULSE, an Ontario-wide study conducted in 2009-2010, and revised  
7 through an intensive community engagement process involving nine priority population  
8 consultation teams. Measures were also selected for comparability with Statistics Canada  
9 surveys. The survey was pre-tested for clarity and functionality. The study was approved by  
10 research ethics boards at Western University, Unity Health Toronto, and Wilfrid Laurier  
11 University.  
12  
13  
14  
15  
16  
17  
18  
19  
20  
21  
22  
23

#### 24 *Measures*

25  
26 All variables were self-reported. We considered five outcomes reflecting access to  
27 primary, gender-affirming, and general health care:  
28  
29

30 (1) *Access to a primary care provider (PCP)* was coded as yes (versus no) if the participant  
31 reported having a current family doctor or nurse practitioner.  
32  
33

34 (2) *Access to a primary care provider with whom the participant feels comfortable discussing*  
35 *trans health issues* was coded as yes (versus no) if the participant had a primary care provider  
36 and felt very or mostly (versus somewhat or not at all) comfortable discussing trans health issues  
37 with the provider.  
38  
39

40 (3) *Unmet health care need* (yes versus no) if the participant reported needing but not receiving  
41 health care (excluding home care) over the previous 12 months.  
42  
43

44 (4) *Completion of medical gender affirmation* was assessed among those who indicated that they  
45 needed puberty blockers, hormones, and/or surgery and categorized as complete, in process, or  
46 planning but not begun.  
47  
48  
49  
50  
51  
52  
53  
54  
55  
56  
57  
58  
59  
60

1  
2  
3 (5) *On a waitlist for gender-affirming care* was assessed among those who needed but had not  
4 completed gender-affirming care and coded as yes (versus no) if the respondent indicated being  
5 on a waitlist for a mental health assessment, puberty blockers, hormones, and/or surgery.  
6  
7

8  
9  
10 Province/territory was the exposure of interest. Province/territory was the exposure of  
11 interest. To avoid small cell sizes, we grouped together the territories (Northwest, Nunavut,  
12 Yukon) and the Maritime provinces (Prince Edward Island, New Brunswick, Nova Scotia). Due  
13 to markedly different crude outcome frequencies, we did not group Newfoundland and Labrador  
14 with the Maritime provinces despite this being a part of the Atlantic region. For comparability  
15 across provinces or regions, we standardized the population structure through adjustment for a  
16 set of demographic variables. Selection of these variables was guided by Levesque's model of  
17 patient-centered access to care;<sup>15</sup> in particular, we adjusted for socio-demographic determinants  
18 of health service approachability, acceptability, availability, affordability, and appropriateness  
19 that might vary by (without being caused by) geographic location. Therefore, covariates for all  
20 multivariable analyses included age (in years), lived gender (man or boy, woman or girl,  
21 Indigenous or other cultural gender identity, non-binary or similar identity), ethnoracial group  
22 (Indigenous, non-Indigenous racialized, or white), rurality (yes vs. no, based on postal code),  
23 education (less than high school, high school graduate, or any post-secondary education), low-  
24 income household (Statistics Canada Low-Income Measure<sup>16</sup>), immigration history (born in  
25 Canada vs. not).  
26  
27  
28  
29  
30  
31  
32  
33  
34  
35  
36  
37  
38  
39  
40  
41  
42  
43  
44  
45

#### 46 *Statistical Analysis*

47

48  
49 First, we calculated covariate frequencies stratified by province/region in SAS 9.4 (SAS  
50 Institute Inc., Cary, NC, 2013). Participants who completed the short form survey, who did not  
51 report province/territory of residence, or who were missing data on all outcomes (i.e., who did  
52  
53  
54  
55  
56  
57  
58  
59  
60

1  
2  
3 not complete health care access sections of the questionnaire) were excluded from these  
4  
5 analyses. Of remaining participants, 15.7% (n=349) were missing data on at least one variable,  
6  
7 most often low-income status (n=205). To avoid bias due to complete-case analysis, prior to  
8  
9 subsequent analyses we used multiple imputation by chained equations, using all variables under  
10  
11 *Measures* in the imputation models. As the number of imputations should be at least the fraction  
12  
13 of incomplete cases,<sup>17</sup> we imputed 30 datasets and obtained pooled estimates using *mi estimate*  
14  
15 commands in STATA 16 (StataCorp, College Station, TX, 2019).  
16  
17  
18

19 We then estimated multivariable logistic regression models for the association between  
20  
21 province/region and each outcome (multinomial logistic regression for medical gender  
22  
23 affirmation). All five multivariable models were adjusted for the full set of covariates described  
24  
25 above. Next, we used the *mimrgns* package<sup>18</sup> to estimate average marginal predictions and their  
26  
27 95% confidence intervals for each outcome by province/region. These predicted probabilities can  
28  
29 be intuitively interpreted as the expected frequency of the outcome were the entire sample to live  
30  
31 in the specified province or region.<sup>19</sup> Finally, among waitlisted participants who provided  
32  
33 complete data, we calculated median wait times and used Wilcoxon rank-sum tests to explore  
34  
35 differences by province or region, as well as sex assigned at birth (for surgery only).  
36  
37  
38  
39

40 The study team developed a set of weights to adjust the full-length survey data to the  
41  
42 demographics of all participants (short- and full-length versions). Application of these weights in  
43  
44 the current analysis had no appreciable impact on estimated frequencies or regression  
45  
46 coefficients and thus we present unweighted data herein.  
47  
48

## 49 RESULTS

50  
51 Of 2,873 Trans PULSE Canada participants, 392 completed the short-form survey, 5 did  
52  
53 not report their province/territory of residence, and 259 did not complete the health care access  
54  
55  
56  
57  
58  
59  
60

1  
2  
3 sections of the questionnaire. The 2217 participants included in these analyses resided in all  
4  
5 provinces and territories except Nunavut. The regional distribution of participants was broadly  
6  
7 similar to the Canadian population; however, there was a relatively lower proportion of  
8  
9 respondents in Quebec (11.5%) and higher proportions in British Columbia and Alberta (19.4%  
10  
11 each).<sup>20</sup> Participant characteristics stratified by province or region are shown in Table 1.  
12  
13

14  
15 Most Trans PULSE Canada participants had a PCP (81.4%, 95% CI: 79.8 – 83.0), with  
16  
17 considerable regional variation (Figure 1). The model-predicted probability with a PCP ranged  
18  
19 from 52.1% (95% CI: 20.2 – 84.1) in the Territories to 92.9% (95% CI: 83.5 – 100.0) in  
20  
21 Newfoundland and Labrador. However, only about half (52.3%, 95% CI: 50.3 – 54.2) of trans  
22  
23 and non-binary participants had a PCP with whom they felt mostly or very comfortable  
24  
25 discussing trans health issues (Figure 2). Past-year unmet healthcare need(s) was reported by  
26  
27 44.4% (95% CI: 42.3 – 46.4) of participants, with over one-third reporting unmet need in every  
28  
29 province or region (Figure 3).  
30  
31  
32

33  
34 Among participants who needed gender-affirming medical treatments (n=1627), overall  
35  
36 35.4% (95% CI: 33.3 – 37.6) had completed such care, with predicted probabilities from 16.6%  
37  
38 (95% CI: 0.6 – 32.5) in Newfoundland and Labrador to 59.1% (95% CI: 52.5 – 65.6) in Quebec  
39  
40 (Figure 4). Of those who needed but had not completed gender-affirming care (n=1046), 40.7%  
41  
42 (95% CI: 37.8 – 43.6) were on a waitlist for such care at the time of the study (Figure 5). In  
43  
44 Alberta and the Territories, over half of those still needing gender-affirming care were estimated  
45  
46 to be on a waitlist. Nationally, of 416 participants on a waitlist for gender-affirming care, 82.0%  
47  
48 (n=341) were waiting for surgery, 14.9% (n=62) for a mental health assessment, 13.2% (n=55)  
49  
50 for hormone therapy, and 0.5% (n=2) for puberty blockers (results not shown). Median [IQR]  
51  
52 time on a waitlist was 6.0 [3.0-12.0] months for surgery, 5.5 [3.0-11.0] months for mental health  
53  
54  
55  
56  
57  
58  
59  
60



1  
2  
3 assessments, and 4.0 [2.0-6.0] months for hormones. Median wait times did not vary  
4  
5 significantly by province or region ( $p$  from 0.191 – 0.637). Median wait times for surgery did not  
6  
7 vary by sex assigned at birth ( $p=0.213$ ).  
8  
9

## 10 11 **INTERPRETATION**

12  
13 Among 2217 transgender and non-binary residents of Canada surveyed in 2019, we  
14  
15 found suboptimal access to both general and gender-affirming healthcare services. Although the  
16  
17 majority of participants had a PCP, in six of nine provinces or regions, the estimated proportion  
18  
19 with a primary care provider was lower than the national average in 2019 (85.5%).<sup>21</sup> Realizable  
20  
21 access to trans-competent care was less common, with between 42.2% and 65.8% indicating they  
22  
23 had a PCP with whom they felt comfortable discussing trans health issues. Between 33.1% and  
24  
25 61.5% reported past-year unmet healthcare need(s), far exceeding the Canadian Community  
26  
27 Health Survey (CCHS) estimate of 5.5% in 2017-2018.<sup>22</sup>  
28  
29  
30

31  
32 In Ontario, data are available from a 2009-2010 province-wide respondent-driven  
33  
34 sampling study, although results are not directly comparable due to use of standardization in the  
35  
36 present study and our wider age range (14+ versus 16+). In the previous study, an estimated  
37  
38 82.8% of trans Ontarians had a family physician, about two-fifths had a PCP with whom they felt  
39  
40 comfortable discussing trans health issues, and 33.2% had a past-year unmet healthcare  
41  
42 need.<sup>8,10,11</sup> Estimates in the current study are not substantially changed from the 2009-2010 data,  
43  
44 indicating the persistence of profound inequities in access to care.  
45  
46  
47

48  
49 Intra-provincial/regional variation in health care access among trans and non-binary  
50  
51 people may reflect differences in provincial health insurance schemes, provider availability, and  
52  
53 continuing education of healthcare providers. For example, Quebec had the highest proportion of  
54  
55 respondents indicating that they had completed medical gender affirmation, which may be  
56  
57  
58  
59  
60

1  
2  
3 related to the province having both a universal pharmacare program and the country's largest  
4 gender-affirming surgical centre (and until recently the only domestic provider of genital  
5 surgeries). Although other provincial and territorial health insurance plans will cover the costs of  
6 out-of-province surgery, travel and accommodation are generally the patient's financial  
7 responsibility. Similarly, respondents from Quebec were least likely to be on waitlists for  
8 gender-affirming care, followed by those in Ontario, where Canada's first hospital-based gender-  
9 affirming surgical program is located.  
10  
11  
12  
13  
14  
15  
16  
17  
18

19 That participants from Newfoundland and Labrador reported the best access to primary care  
20 may reflect the availability of a small number of trans-affirming healthcare providers in the St.  
21 John's region who are sufficient to facilitate access locally, at least for trans and non-binary  
22 individuals connected to trans community networks. Finally, although results should be  
23 cautiously interpreted due to small numbers and wide confidence intervals, respondents from the  
24 Yukon and Northwest Territories appeared to fare worse than other trans and non-binary  
25 Canadians.  
26  
27  
28  
29  
30  
31  
32  
33  
34

35 Future studies should examine reasons for inter- (and intra-) provincial variation in access  
36 to gender-affirming care, including qualitative studies and studies focused on healthcare  
37 providers and system factors. In addition, the recent addition of new gender measures to  
38 nationally representative surveys including the Canadian Community Health Survey will permit  
39 population-based analyses of inter-provincial/territorial differences in general healthcare access,  
40 and direct assessment of inequalities in comparison to the broader population.  
41  
42  
43  
44  
45  
46  
47  
48

#### 49 *Limitations*

50  
51 Our study has clear limitations. Sampling was non-random; despite efforts to reduce  
52 participation bias (e.g., using a multimode survey) and to use adjustment to standardize the  
53  
54  
55  
56  
57  
58  
59  
60

1  
2  
3 population structure across provinces and regions, regional differences may reflect a combination  
4  
5 of true population differences and sampling artefacts. In addition, small samples in some  
6  
7 provinces/territories created imprecision in estimates, as indicated by wide CIs. Addressing this  
8  
9 through grouping of the Maritimes and territories may obscure heterogeneity across those less  
10  
11 populous individual provinces or territories. Our comparisons with CCHS data do not account  
12  
13 for regional differences in healthcare access in the broader population, nor for differences  
14  
15 between the sociodemographic structure of the trans and non-binary population and the general  
16  
17 population (e.g., younger age). Finally, provincial and regional estimates may obscure important  
18  
19 within-province heterogeneity, such as intersectional inequalities by gender identity and  
20  
21 race/ethnicity.<sup>8</sup>  
22  
23  
24  
25

### 26 *Conclusion*

27  
28 Since the first survey data on healthcare access among trans people in Canada were  
29  
30 collected in Ontario in 2009-2010, multiple initiatives to expand and enhance trans health  
31  
32 services have been implemented. Nevertheless, these data demonstrate that trans and non-binary  
33  
34 people in Canada continue to be medically underserved, with particularly stark differences in  
35  
36 unmet healthcare need relative to the wider Canadian population and significant wait times for  
37  
38 potentially urgent gender-affirming care. The existence of provincial and regional variation in  
39  
40 access to both primary and gender-affirming care underscores the importance of continuing  
41  
42 efforts to improve provider training and availability, public insurance coverage (including for  
43  
44 travel and all aspects of surgical and pre- and post-surgical care), as well as care navigation  
45  
46 supports, for trans and non-binary people across Canada.  
47  
48  
49  
50  
51  
52  
53  
54  
55  
56  
57  
58  
59  
60

1  
2  
3  
4  
5  
6  
7  
8  
9  
10  
11  
12  
13  
14  
15  
16  
17  
18  
19  
20  
21  
22  
23  
24  
25  
26  
27  
28  
29  
30  
31  
32  
33  
34  
35  
36  
37  
38  
39  
40  
41  
42  
43  
44  
45  
46  
47

| <b>Table 1. Characteristics stratified by province/region<sup>a</sup></b> |                                 |                                 |                                |                                |                                 |                                 |                                |                                       |                                    |
|---------------------------------------------------------------------------|---------------------------------|---------------------------------|--------------------------------|--------------------------------|---------------------------------|---------------------------------|--------------------------------|---------------------------------------|------------------------------------|
|                                                                           | <b>BC<br/>n (%)<br/>(n=430)</b> | <b>AB<br/>n (%)<br/>(n=430)</b> | <b>SK<br/>n (%)<br/>(n=81)</b> | <b>MB<br/>n (%)<br/>(n=58)</b> | <b>ON<br/>n (%)<br/>(n=780)</b> | <b>QC<br/>n (%)<br/>(n=255)</b> | <b>NL<br/>n (%)<br/>(n=27)</b> | <b>Maritime<br/>n (%)<br/>(n=146)</b> | <b>NWT/YK<br/>n (%)<br/>(n=10)</b> |
| Age (median, [IQR])                                                       | 30 [24-40]                      | 27 [22-35]                      | 26 [22-31]                     | 29 [24-36]                     | 28 [23-37]                      | 27 [22-33]                      | 25 [22-30]                     | 28 [22-35]                            | 35 [26-40]                         |
| <b>Lived gender</b>                                                       |                                 |                                 |                                |                                |                                 |                                 |                                |                                       |                                    |
| Man or boy                                                                | 122 (28.4)                      | 129 (30.0)                      | 19 (23.5)                      | 22 (37.9)                      | 243 (31.2)                      | 98 (38.4)                       | 12 (44.4)                      | 59 (40.4)                             | 4 (40.0)                           |
| Woman or girl                                                             | 140 (32.6)                      | 140 (32.6)                      | 23 (28.4)                      | 6 (10.3)                       | 216 (27.7)                      | 68 (26.7)                       | 9 (33.3)                       | 37 (25.3)                             | 1 (10.0)                           |
| Indigenous or other cultural gender                                       | 18 (4.2)                        | 31 (7.2)                        | 8 (9.9)                        | 4 (6.9)                        | 49 (6.3)                        | 4 (1.6)                         | 1 (3.7)                        | 11 (7.5)                              | 0 (0.0)                            |
| Non-binary, genderqueer, agender, or similar                              | 150 (34.9)                      | 129 (30.0)                      | 31 (38.3)                      | 26 (44.8)                      | 268 (34.4)                      | 85 (33.3)                       | 5 (18.5)                       | 39 (26.7)                             | 5 (50.0)                           |
| Missing                                                                   | 0                               | 1 (0.2)                         | 0 (0.0)                        | 0 (0.0)                        | 4 (0.5)                         | 0 (0.0)                         | 0 (0.0)                        | 0 (0.0)                               | 0 (0.0)                            |
| <b>Ethnoracial group</b>                                                  |                                 |                                 |                                |                                |                                 |                                 |                                |                                       |                                    |
| Indigenous                                                                | 35 (8.1)                        | 42 (9.8)                        | 13 (16.1)                      | 7 (12.1)                       | 56 (7.2)                        | 12 (4.7)                        | 2 (7.4)                        | 6 (4.1)                               | 3 (30.0)                           |
| Racialized, non-Indigenous                                                | 48 (11.2)                       | 38 (8.8)                        | 3 (3.7)                        | 8 (13.8)                       | 116 (14.9)                      | 17 (6.7)                        | 0 (0.0)                        | 6 (4.1)                               | 0 (0.0)                            |
| White                                                                     | 343 (79.8)                      | 347 (80.7)                      | 65 (80.3)                      | 43 (74.1)                      | 600 (76.9)                      | 222 (87.1)                      | 25 (92.6)                      | 132 (90.4)                            | 7 (70.0)                           |
| Missing                                                                   | 4 (0.9)                         | 3 (0.7)                         | 0 (0.0)                        | 0 (0.0)                        | 8 (1.0)                         | 4 (1.6)                         | 0 (0.0)                        | 2 (1.4)                               | 0 (0.0)                            |
| <b>Education</b>                                                          |                                 |                                 |                                |                                |                                 |                                 |                                |                                       |                                    |
| Less than high school                                                     | 47 (10.9)                       | 58 (13.5)                       | 12 (14.8)                      | 3 (5.2)                        | 59 (7.6)                        | 27 (10.6)                       | 1 (3.7)                        | 13 (8.9)                              | 3 (30.0)                           |
| High school                                                               | 43 (10.0)                       | 56 (13.0)                       | 10 (12.4)                      | 8 (13.8)                       | 70 (9.0)                        | 31 (12.2)                       | 2 (7.4)                        | 25 (17.1)                             | 0 (0.0)                            |
| Any college or university                                                 | 339 (78.8)                      | 313 (72.8)                      | 59 (72.8)                      | 46 (79.3)                      | 650 (83.3)                      | 196 (76.9)                      | 24 (88.9)                      | 108 (74.0)                            | 7 (70.0)                           |
| Missing                                                                   | 1 (0.2)                         | 3 (0.7)                         | 0 (0.0)                        | 1 (1.7)                        | 1 (0.1)                         | 1 (0.4)                         | 0 (0.0)                        | 0 (0.0)                               | 0 (0.0)                            |

|                                   | <b>BC<br/>n (%)<br/>(n=430)</b> | <b>AB<br/>n (%)<br/>(n=430)</b> | <b>SK<br/>n (%)<br/>(n=81)</b> | <b>MB<br/>n (%)<br/>(n=58)</b> | <b>ON<br/>n (%)<br/>(n=780)</b> | <b>QC<br/>n (%)<br/>(n=255)</b> | <b>NL<br/>n (%)<br/>(n=27)</b> | <b>Maritime<br/>n (%)<br/>(n=146)</b> | <b>NWT/YK<br/>n (%)<br/>(n=10)</b> |
|-----------------------------------|---------------------------------|---------------------------------|--------------------------------|--------------------------------|---------------------------------|---------------------------------|--------------------------------|---------------------------------------|------------------------------------|
| <b>Low-income household</b>       |                                 |                                 |                                |                                |                                 |                                 |                                |                                       |                                    |
| Yes                               | 169 (39.3)                      | 152 (35.4)                      | 31 (38.3)                      | 21 (36.2)                      | 314                             | 121                             | 12 (44.4)                      | 61 (41.8)                             | 3 (30.0)                           |
| No                                | 218 (50.7)                      | 221 (51.4)                      | 39 (48.2)                      | 35 (60.3)                      | 412                             | 115                             | 10 (37.0)                      | 72 (49.3)                             | 6 (60.0)                           |
| Missing <sup>b</sup>              | 43 (10.0)                       | 57 (13.3)                       | 11 (13.6)                      | 2 (3.5)                        | 54 (6.9)                        | 19 (7.5)                        | 5 (18.5)                       | 13 (8.9)                              | 1 (10.0)                           |
| <b>Rural</b>                      |                                 |                                 |                                |                                |                                 |                                 |                                |                                       |                                    |
| Yes                               | 29 (6.7)                        | 18 (4.2)                        | 8 (9.9)                        | 4 (6.9)                        | 34 (4.4)                        | 15 (5.9)                        | 1 (3.7)                        | 12 (8.2)                              | 2 (20.0)                           |
| No                                | 394 (91.6)                      | 400 (93.0)                      | 71 (87.7)                      | 53 (91.4)                      | 725                             | 231                             | 25 (92.6)                      | 131 (89.7)                            | 8 (80.0)                           |
| Missing                           | 7 (1.6)                         | 12 (2.8)                        | 2 (2.5)                        | 1 (1.7)                        | 21 (2.7)                        | 9 (3.5)                         | 1 (3.7)                        | 3 (2.1)                               | 0 (0.0)                            |
| <b>Born in Canada</b>             |                                 |                                 |                                |                                |                                 |                                 |                                |                                       |                                    |
| Yes                               | 333 (77.4)                      | 389 (90.5)                      | 75 (92.6)                      | 56 (96.6)                      | 677                             | 227                             | 26 (96.3)                      | 136 (93.2)                            | 9 (90.0)                           |
| No                                | 94 (21.9)                       | 39 (9.1)                        | 5 (6.2)                        | 2 (3.5)                        | 95 (12.2)                       | 28 (11.0)                       | 1 (3.7)                        | 10 (6.9)                              | 1 (10.0)                           |
| Missing                           | 3 (0.7)                         | 2 (0.5)                         | 1 (1.2)                        | 0 (0.0)                        | 8 (1.0)                         | 0 (0.0)                         | 0 (0.0)                        | 0 (0.0)                               | 0 (0.0)                            |
| <b>Medical gender affirmation</b> |                                 |                                 |                                |                                |                                 |                                 |                                |                                       |                                    |
| Complete                          | 102 (23.7)                      | 90 (20.9)                       | 15 (18.5)                      | 11 (19.0)                      | 195                             | 103                             | 3 (11.1)                       | 36 (24.7)                             | 4 (40.0)                           |
| In process                        | 167 (38.8)                      | 131 (30.5)                      | 26 (32.1)                      | 24 (41.4)                      | 254                             | 43 (16.9)                       | 10 (37.0)                      | 58 (39.7)                             | 2 (20.0)                           |
| Planning but not begun            | 51 (11.9)                       | 81 (18.8)                       | 13 (16.1)                      | 6 (10.3)                       | 101                             | 29 (11.4)                       | 5 (18.5)                       | 20 (13.7)                             | 1 (10.0)                           |
| Not planning or unsure            | 99 (23.0)                       | 116 (27.0)                      | 26 (32.1)                      | 16 (27.6)                      | 206                             | 67 (26.3)                       | 9 (33.3)                       | 26 (17.8)                             | 2 (20.0)                           |
| Missing                           | 11 (2.6)                        | 12 (2.8)                        | 1 (1.2)                        | 1 (1.7)                        | 24 (3.1)                        | 13 (5.1)                        | 0 (0.0)                        | 6 (4.1)                               | 1 (10.0)                           |

<sup>a</sup>BC = British Columbia, AB = Alberta, SK = Saskatchewan, MB = Manitoba, ON = Ontario, QC = Quebec, NL = Newfoundland and Labrador, Maritime = New Brunswick, Nova Scotia, Prince Edward Island, NWT/YK = Northwest Territories and Yukon.

<sup>b</sup>Including participants aged 14-15 who were not asked income questions.

**Figure 1. Adjusted predicted probability of having a primary care provider among Trans PULSE Canada participants (n=2217), 2019**

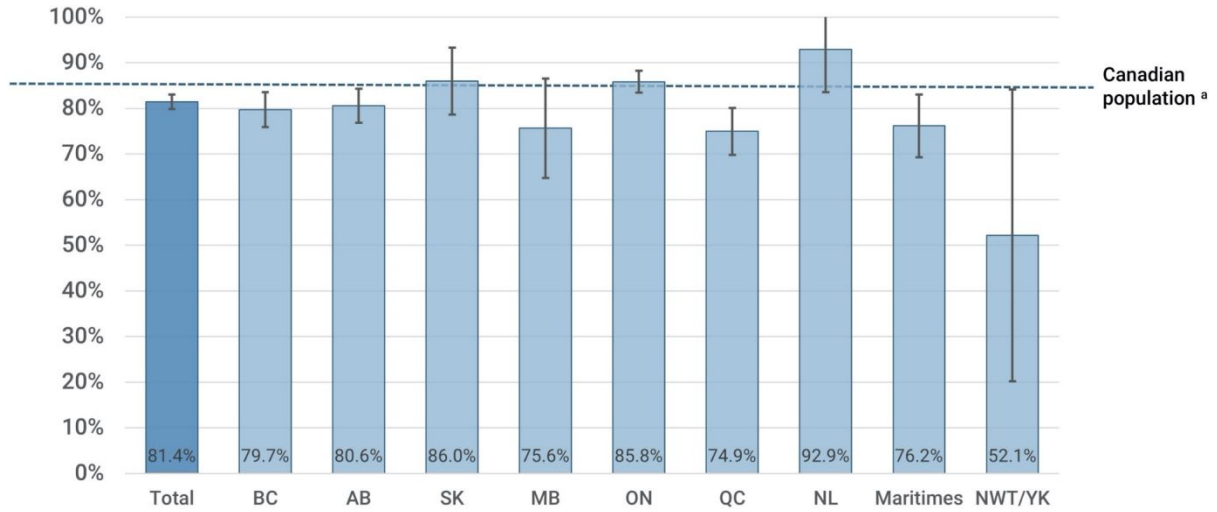

a. In 2019, 85.5% of Canadians aged 12+ had a primary care provider (Canadian Community Health Survey).

Note: British Columbia, AB = Alberta, SK = Saskatchewan, MB = Manitoba, ON = Ontario, QC = Quebec, NL = Newfoundland and Labrador, Maritime = New Brunswick, Nova Scotia, Prince Edward Island, NWT/YK = Northwest Territories and Yukon.

**Figure 2. Adjusted predicted probability of having a primary care provider with whom the respondent is comfortable discussing trans issues, among Trans PULSE Canada participants (n=2217), 2019**

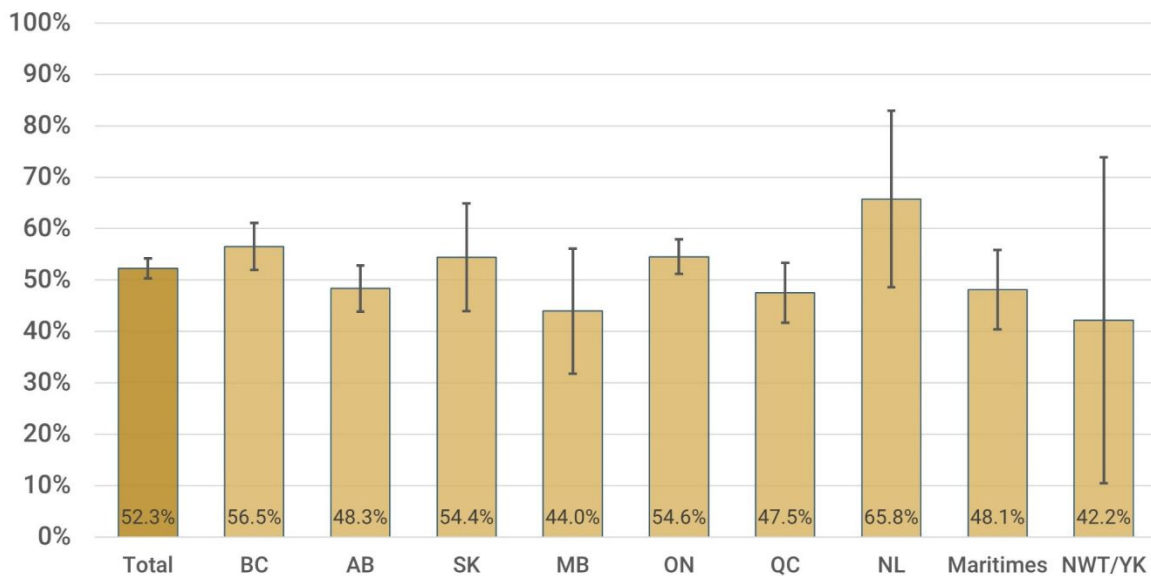

Note: British Columbia, AB = Alberta, SK = Saskatchewan, MB = Manitoba, ON = Ontario, QC = Quebec, NL = Newfoundland and Labrador, Maritime = New Brunswick, Nova Scotia, Prince Edward Island, NWT/YK = Northwest Territories and Yukon.

**Figure 3. Adjusted predicted probability of past-year unmet healthcare need among Trans PULSE Canada participants (n=2217), 2019**

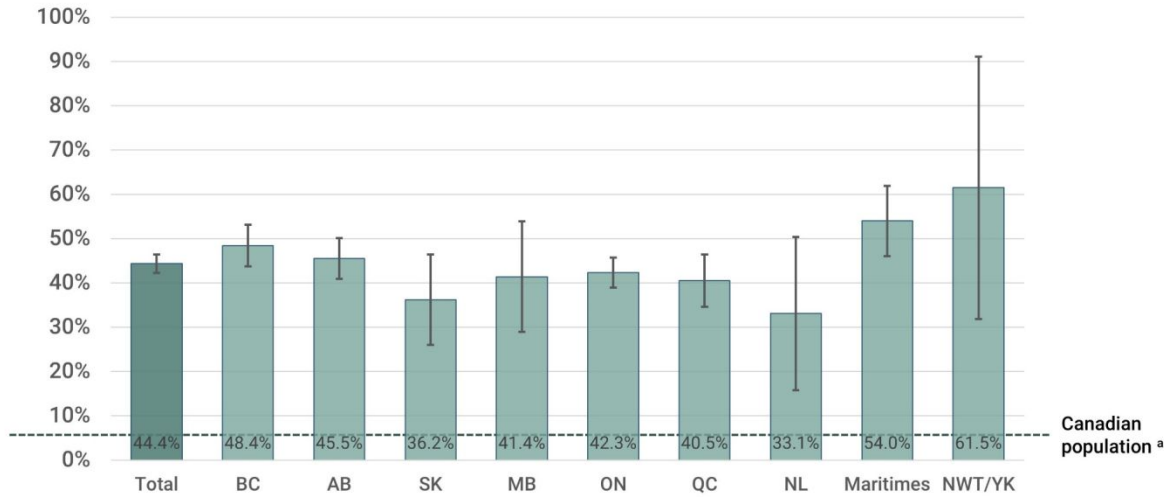

a. In 2017/2018, 5.5% of Canadians aged 12+ had a past-year unmet health care need (Canadian Community Health Survey, based on included provinces—Alberta, Manitoba, Ontario, New Brunswick, and Nova Scotia).

Note: British Columbia, AB =Alberta, SK = Saskatchewan, MB =Manitoba, ON = Ontario, QC = Quebec, NL = Newfoundland and Labrador, Maritime= New Brunswick, Nova Scotia, Prince Edward Island, NWT/YK = Northwest Territories and Yukon.

**Figure 4. Adjusted predicted probabilities for medical gender affirmation status among Trans PULSE Canada participants needing gender-affirming care (n=1627), 2019**

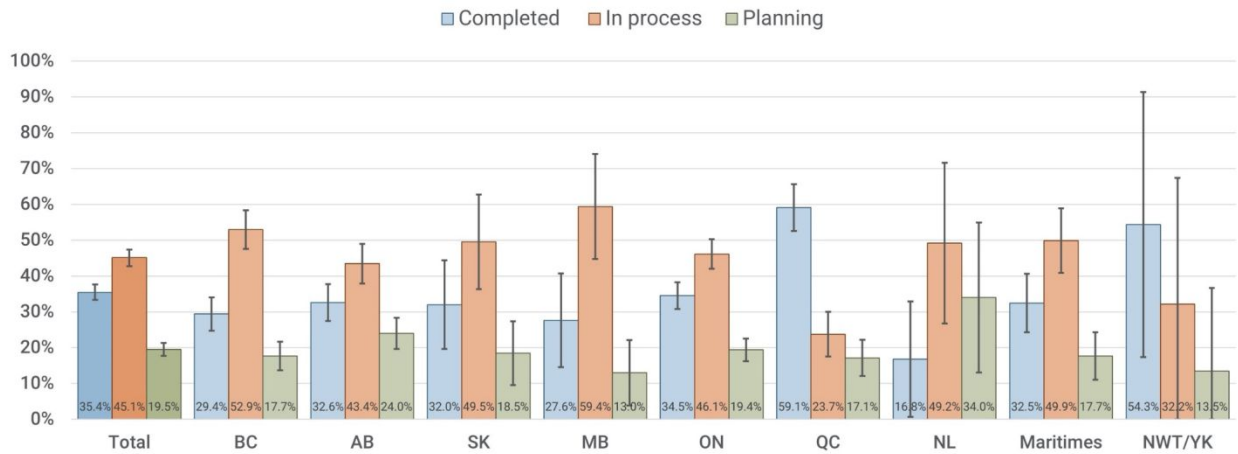

Note: British Columbia, AB =Alberta, SK = Saskatchewan, MB =Manitoba, ON = Ontario, QC = Quebec, NL = Newfoundland and Labrador, Maritime= New Brunswick, Nova Scotia, Prince Edward Island, NWT/YK = Northwest Territories and Yukon.

1  
2  
3  
4  
5  
6  
7  
8  
9  
10  
11  
12  
13  
14  
15  
16  
17  
18  
19  
20  
21  
22  
23  
24  
25  
26  
27  
28  
29  
30  
31  
32  
33  
34  
35  
36  
37  
38  
39  
40  
41  
42  
43  
44  
45  
46  
47  
48  
49  
50  
51  
52  
53  
54  
55  
56  
57  
58  
59  
60

**Figure 5. Adjusted predicted probability of being on a waitlist for gender-affirming care, among Trans PULSE Canada participants needing but not having completed care (n=1046), 2019**

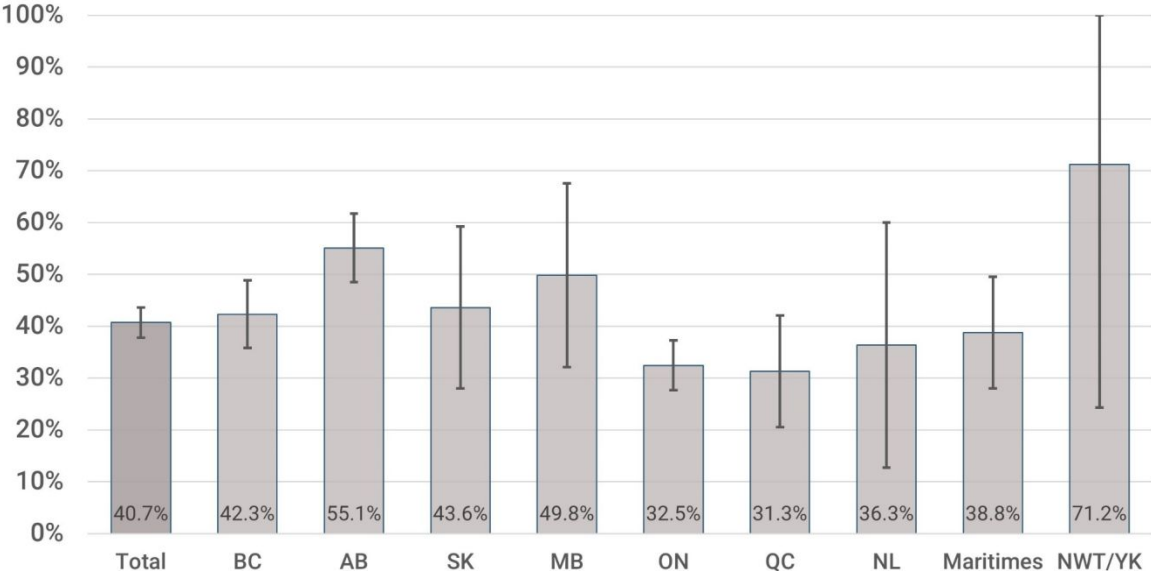

Note: British Columbia, AB =Alberta, SK = Saskatchewan, MB =Manitoba, ON = Ontario, QC = Quebec, NL = Newfoundland and Labrador, Maritime= New Brunswick, Nova Scotia, Prince Edward Island, NWT/YK = Northwest Territories and Yukon.



## REFERENCES

1. Goldhammer H, Malina S, Keuroghlian AS. communicating with patients who have nonbinary gender identities. *Ann Fam Med*. 2018;16(6):559-562. doi:10.1370/afm.2321.
2. Goodman M, Adams N, Corneil T, Kreukels B, Motmans J, Coleman E. Size and distribution of transgender and gender Nonconforming populations: a narrative review. *Endocrinol Metab Clin North Am*. 2019;48(2):303-321. doi:10.1016/j.ecl.2019.01.001.
3. Reisner SL, Poteat T, Keatley JA, et al. Global health burden and needs of transgender populations: a review. *The Lancet*. 2016;388(10042):412-436. doi:10.1016/S0140-6736(16)00684-X.
4. Scheim AI, Bauer GR. Sex and gender diversity among transgender persons in Ontario, Canada: results from a respondent-driven sampling survey. *J Sex Res*. 2015;52(1):1-14. doi:10.1080/00224499.2014.893553.
5. Bauer GR, Scheim AI, Pyne J, Travers R, Hammond R. Intervenable factors associated with suicide risk in transgender persons: a respondent driven sampling study in Ontario, Canada. *BMC Public Health*. 2015;15(1):525. doi:10.1186/s12889-015-1867-2.
6. Rotondi NK, Bauer GR, Scanlon K, Travers A, Kaay M, Travers R. Nonprescribed hormone use and self-performed surgeries: “do-it-yourself” transitions in transgender communities in Ontario, Canada. *Am J Public Health*. 2013;103(10):1830-1836. doi:10.2105/AJPH.2013.301348.
7. Bryant T, Mikkonen J, Raphael AD. *Social Determinants of Health: the Canadian Facts*. Oshawa: Ontario Tech University Faculty of Health Sciences and Toronto: York University School of Health Policy and Management. 2020.
8. Scheim AI, Zong X, Giblon R, Bauer GR. Disparities in access to family physicians among transgender people in Ontario, Canada. *Int J Transgenderism*. 2017;18(3):343-352. doi:10.1080/15532739.2017.1323069.
9. Statistics Canada. *Access to a Regular Medical Doctor, 2011*. <http://www.statcan.gc.ca/pub/82-625-x/2012001/article/11656-eng.htm> (Accessed 15 Feb 2021).
10. Giblon R, Bauer GR. Health care availability, quality, and unmet need: a comparison of transgender and cisgender residents of Ontario, Canada. *BMC Health Serv Res*. 2017;17(1):283. doi:10.1186/s12913-017-2226-z.
11. Bauer GR, Zong X, Scheim AI, Hammond R, Thind A. Factors impacting transgender patients’ discomfort with their family physicians: a respondent-driven sampling survey. *PLoS ONE*. 2015;10(12):e0145046–16. doi:10.1371/journal.pone.0145046.

12. Clark BA, Veale JF, Greyson D, Saewyc E. Primary care access and foregone care: a survey of transgender adolescents and young adults. *Fam Pract.* 2018;35(3):302-306. doi:10.1093/fampra/cmz112.
13. Trans Care BC. <http://www.phsa.ca/transcarebc/> (Accessed 15 Feb 2021).
14. Rainbow Health Ontario. <https://www.rainbowhealthontario.ca> (Accessed 15 Feb 2021).
15. Levesque J-F, Harris MF, Russell G. Patient-centred access to health care: conceptualising access at the interface of health systems and populations. *Int J Equity Health.* 2013;12(1):18. doi:10.1186/1475-9276-12-18.
16. Statistics Canada. Table 11-10-0232-01: Low income measure (LIM) thresholds by income source and household size. <https://www150.statcan.gc.ca/t1/tbl1/en/tv.action?pid=1110023201>. Accessed February 18, 2021.
17. White IR, Royston P, Wood AM. Multiple imputation using chained equations: Issues and guidance for practice. *Stat Med.* 2010;30(4):377-399. doi:10.1002/sim.4067.
18. Klein D. MIMRGNS: Stata module to run margins after mi estimate. *Statistical Software Components*. Boston College Department of Economics. 2014 (revised 17 Nov 2020). <https://ideas.repec.org/c/boc/bocode/s457795.html> (Accessed 15 Feb 2021).
19. Williams R. Using the margins command to estimate and interpret adjusted predictions and marginal effects. *Stata Journal.* 2012;12(2):308-331. doi:10.1177/1536867x1201200209.
20. Statistics Canada. *Table 17-10-0005-01: Population Estimates on July 1st, by Age and Sex.* <https://www150.statcan.gc.ca/t1/tbl1/en/tv.action?pid=1710000501&pickMembers%5B0%5D=1.3&pickMembers%5B1%5D=2.1&cubeTimeFrame.startYear=2016&cubeTimeFrame.endYear=2020&referencePeriods=20160101%2C20200101> (Accessed 15 Feb 2021).
21. Statistics Canada. *Primary Health Care Providers, 2019.* <https://www150.statcan.gc.ca/n1/en/pub/82-625-x/2020001/article/00004-eng.pdf?st=mhbe0C6F> (Accessed 15 Feb 2021).
22. Statistics Canada. (n.d.). *Canadian Community Health Survey, 2017-2018: Annual Component [Public use microdata file accessed via ODESI]*. Data Liberation Initiative, Statistics Canada.
